# Supplementary material for: Upcycling waste expanded polystyrene into UV-excited dual-mode multicolor luminescent electrospun fiber membranes for advanced anti-counterfeiting
Source: Royal Society of Chemistry journal article supplement (doi:10.1039/d3ra00509g), 2023-01-01
Supplement: d3ra00509g1.pdf [file d3ra00509g1.pdf]

## Electronic Supplementary Information (ESI)

Upcycling waste expanded polystyrene into UV-excited dual-mode multicolor luminescent electrospun fiber membranes for advanced anti-counterfeiting

Yunjie Fan,<sup>ab</sup> Huanyou Su,<sup>b</sup> Pengfei Li,<sup>b</sup> Mingmin Lin,<sup>b</sup> Dan Liu,<sup>\*b</sup> Kemei Pei<sup>\*a</sup> and Xuebo Cao<sup>\*b</sup>

*<sup>a</sup>Department of Chemistry, Zhejiang Sci-Tech University, Hangzhou 310018, China.  
E-mail: peikemei@zstu.edu.cn*

*<sup>b</sup>College of Biological, Chemical Sciences and Engineering, Jiaying University, Jiaying 314001, China. E-mail: liudan@zjxu.edu.cn; xbcao@zjxu.edu.cn*

## Materials and Methods

### Materials

PS was from the used product-packaging EPS. Europium hexahydrate ( $\text{Eu}(\text{NO}_3)_3 \cdot 6\text{H}_2\text{O}$ ), terbium nitrate hexahydrate ( $\text{Tb}(\text{NO}_3)_3 \cdot 6\text{H}_2\text{O}$ ), 2-thenoyltrifluoroacetone (TTA) and 1,10-phenanthroline ( $\text{Phen} \cdot \text{H}_2\text{O}$ ) were purchased from Shanghai Dibo Bio-Technique Co., Ltd. Acetylacetone (AcAc), dichloromethane, sodium hydroxide, anhydrous alcohol and N,N-dimethylformamide (DMF) were purchased from Sinopharm Chemical Reagent Co., Ltd. Industrial alcohol was provided by Jiaxing Shengde Chemical Industry Co., Ltd.

### Recycling of waste EPS

2 g used product-packaging EPS was cut into small pieces and then dissolved in 40 mL dichloromethane. The solution of PS was precipitated with a lot of industrial alcohol, filtered off, and dried at 60 °C for 12 h in a vacuum oven to yield the recycled PS.

### Synthesis of the $\text{Eu}^{3+}$ complex and $\text{Tb}^{3+}$ complex

1.332 g (6 mmol) TTA, 0.396 g (2 mmol)  $\text{Phen} \cdot \text{H}_2\text{O}$  and 0.892 g (2 mmol)  $\text{Eu}(\text{NO}_3)_3 \cdot 6\text{H}_2\text{O}$  were dissolved in 6 mL anhydrous ethanol, respectively. The obtained solutions were mixed. The mixture solution was neutralized with 1M NaOH solution. The reaction mixture was heated at 60 °C for 2 h. The obtained precipitate was filtered, washed several times with anhydrous ethanol, and dried at 60 °C for 12 h in a vacuum oven to yield the  $\text{Eu}^{3+}$  complex. A similar procedure was used to prepare the  $\text{Tb}^{3+}$  complex by replacing  $\text{Eu}(\text{NO}_3)_3 \cdot 6\text{H}_2\text{O}$  and TTA with  $\text{Tb}(\text{NO}_3)_3 \cdot 6\text{H}_2\text{O}$  and AcAc, respectively. The mole ratio of  $\text{Tb}(\text{NO}_3)_3 \cdot 6\text{H}_2\text{O}$ , AcAc and  $\text{Phen} \cdot \text{H}_2\text{O}$  is 1:3:1. The synthetic procedure of the  $\text{Eu}^{3+}$  complex and  $\text{Tb}^{3+}$  complex and the digital images of the corresponding powder samples under UV lights are shown in Fig. S1.

### Characterization

Fourier transform infrared spectra (FTIR) were carried out on a Thermo Nicolet Nexus 470 FT-IR spectrophotometer in the 4000-400  $\text{cm}^{-1}$  region using

KBr pellets at room temperature. Digital images were taken using a Nikon camera.

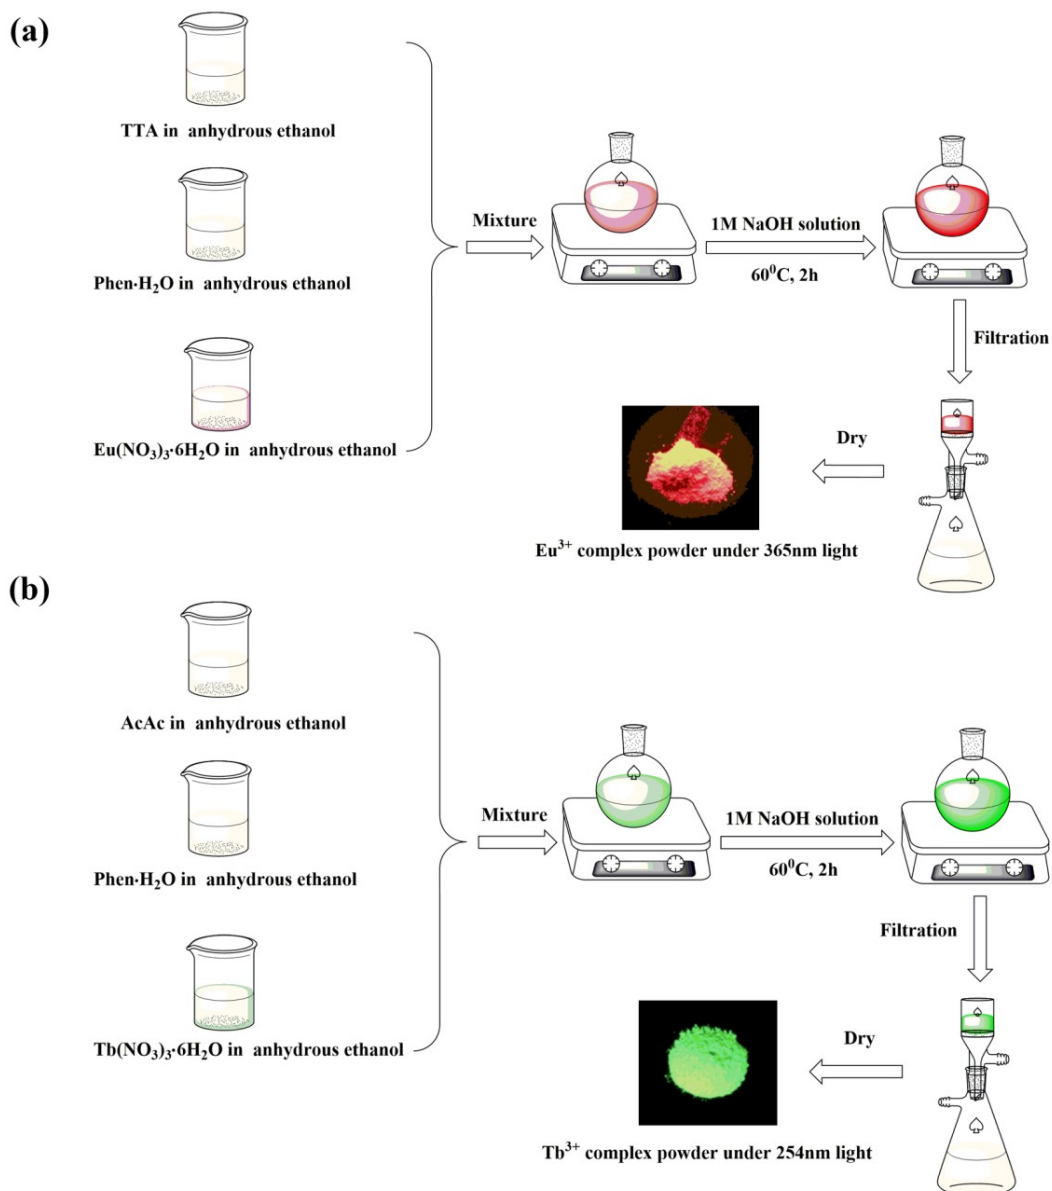

Fig. S1 Synthetic procedure of the Eu<sup>3+</sup> complex (a) and Tb<sup>3+</sup> complex (b) and the digital images of the corresponding powder samples under 365 nm or 254 nm UV lights, respectively.

## Results and discussion

### Characterization of the recycled PS

Fig. S2 shows the FTIR spectrum of the recycled PS. The bands at 3060 cm<sup>-1</sup> and 3026 cm<sup>-1</sup> are assigned to the stretching vibrations of the C-H band on the benzene ring.

The bands at 2921  $\text{cm}^{-1}$  and 2850  $\text{cm}^{-1}$  are attributed to the asymmetric stretching vibration and symmetric stretching vibration of the  $\text{CH}_2$  group, respectively. The absorption bands at 1601  $\text{cm}^{-1}$ , 1493  $\text{cm}^{-1}$  and 1450  $\text{cm}^{-1}$  are assigned to the bent vibrations of the  $\text{C}=\text{C}$  of the benzene ring. The absorption bands at 755  $\text{cm}^{-1}$  and 697  $\text{cm}^{-1}$  are corresponding to the bent vibrations of the  $\text{C}-\text{H}$  of the single substituted benzene ring.

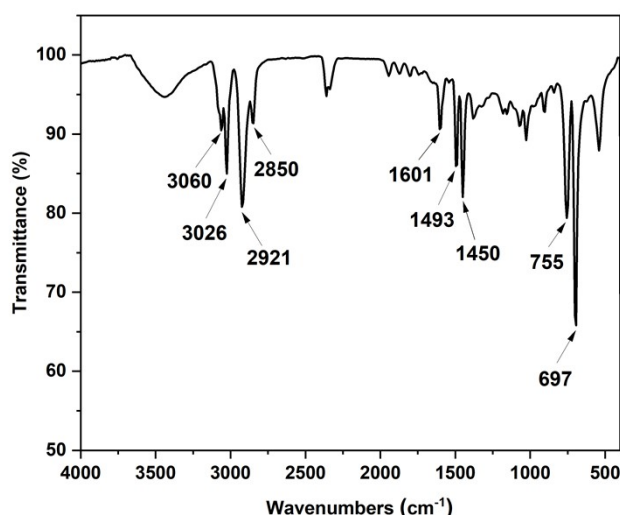

Fig. S2 FTIR spectrum of the recycled PS.

### Characterization of the lanthanide complexes

Fig. S3 displays the FTIR spectrum of the as-prepared  $\text{Eu}^{3+}$  complex, as well as those of the corresponding ligands for comparative analysis. It can be found that the  $\text{C}=\text{O}$  and  $\text{C}=\text{C}$  stretching vibration bands of TTA shifted from 1655  $\text{cm}^{-1}$  and 1584  $\text{cm}^{-1}$  in Fig. S3a to 1628  $\text{cm}^{-1}$  and 1540  $\text{cm}^{-1}$  in Fig. S3c, suggesting the formation of the coordination bonds between the  $\text{Eu}^{3+}$  ions and TTA.<sup>1,2</sup> On the other hand, the band corresponding to the  $\text{C}=\text{N}$  stretching vibration at 1617  $\text{cm}^{-1}$  and the bands corresponding to the  $\text{C}-\text{H}$  bent vibrations at 854 and 739  $\text{cm}^{-1}$  of Phen in Fig. S3b shifted to 1601  $\text{cm}^{-1}$ , 844  $\text{cm}^{-1}$  and 728  $\text{cm}^{-1}$ , respectively, in Fig. S3c, indicating that Phen also participated in the coordination with the  $\text{Eu}^{3+}$  ions.<sup>1,3</sup> The above results prove that both TTA and Phen coordinated with the  $\text{Eu}^{3+}$  ions in the  $\text{Eu}^{3+}$  complex.

Fig. S4 presents the FTIR spectrum of the as-prepared  $\text{Tb}^{3+}$  complex and the

corresponding ligands. The C=O stretching vibration band of the ligand AcAc shifted from 1621  $\text{cm}^{-1}$  in Fig. S4a to 1587  $\text{cm}^{-1}$  in Fig. S4c, suggesting that AcAc coordinated with the  $\text{Tb}^{3+}$  ions.<sup>4,5</sup> Besides, the band corresponding to the C=N stretching vibration at 1617  $\text{cm}^{-1}$  and the bands corresponding to the C-H bent vibrations at 854 and 739  $\text{cm}^{-1}$  of Phen in Fig. S4b shifted to 1610  $\text{cm}^{-1}$ , 850  $\text{cm}^{-1}$  and 730  $\text{cm}^{-1}$ , respectively, in Fig. S4c, confirming that Phen also coordinated with the  $\text{Tb}^{3+}$  ions. These results demonstrate that both AcAc and Phen participated in the coordination reaction with the  $\text{Tb}^{3+}$  ions.

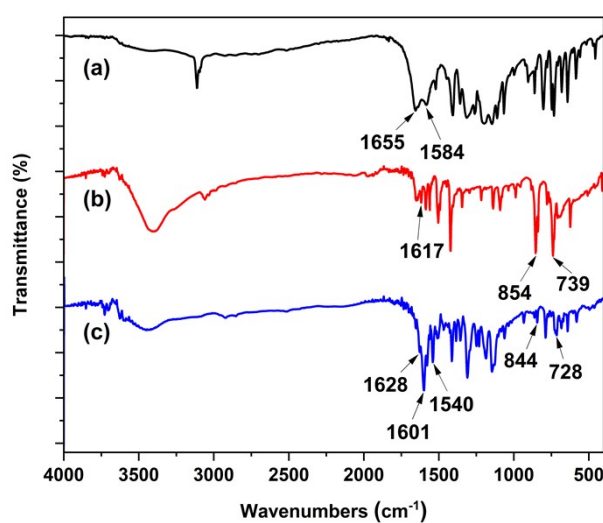

Fig. S3 FTIR spectra of TTA (a), Phen·H<sub>2</sub>O (b) and the Eu<sup>3+</sup> complex (c).

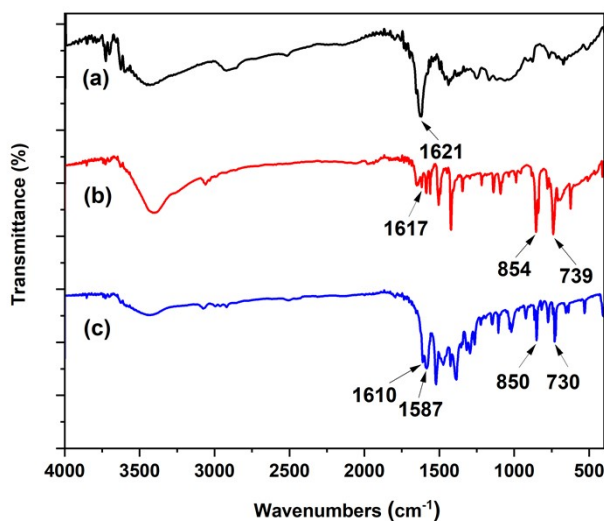

Fig. S4 FTIR spectra of AcAc (a), Phen·H<sub>2</sub>O (b) and the Tb<sup>3+</sup> complex (c).

## Notes and references

- [1] X. P. Zhang, S. P. Wen, S. Hu, L. Q. Zhang and L. Liu, *J. Rare. Earth.*, 2010, **28**, 333-339.
- [2] E. Regalado-Pérez, N. R. Mathews and X. Mathew, *Sol. Energy*, 2020, **199**, 82-91.
- [3] J.-Y. Liu, N. Ren, J.-J. Zhang and C.-Y. Zhang, *Thermochim. Acta*, 2013, **570**, 51-58.
- [4] J. Wang, W.-M. Cao, H. Yang, H.-X. Wu and S.-P. Yang, *J. Shanghai Norm. Univ. (Nat. Sci.)*, 2010, **39**, 166-174.
- [5] I. G. Zaitzeva, N. P. Kuzmina and L. I. Martynenko, *J. Alloy. Compd.*, 1995, **225**, 393-395.
